# Supplementary material for: Screening and identification of a new antimicrobial, Streptomyces rehmanniae, from the rhizosphere of Rehmannia glutinosa
Source: Royal Society of Chemistry journal article supplement (doi:10.1039/d5ra07947k), 2026-04-13
Supplement: d5ra07947k1.pdf [file d5ra07947k1.pdf]

## **Screening and Identification of a Newly Antimicrobial *Streptomyces rehmannaiae* from Rhizosphere of *Rehmannia glutinosa***

Hairong He<sup>a</sup>, Tong Wang<sup>a</sup>, Jiaqi Li<sup>a</sup>, Chen Sun<sup>a</sup>, Zhaoxu Ma<sup>b</sup>, Zhenzhu Zhao<sup>a</sup>, Xiaoke Zheng<sup>a\*</sup>, Pengqiang Du<sup>c\*</sup>

<sup>a</sup>College of Pharmacy, Henan University of Chinese Medicine, Zhengzhou 450046, China

<sup>b</sup>College of Life Science, China West Normal University, Nanchong City, Sichuan 637009, China

<sup>c</sup>College of Plant Protection, Henan Agricultural University, Zhengzhou 450046, China

\*Corresponding authors: [dupengq@163.com](mailto:dupengq@163.com); [zhengxk.2006@163.com](mailto:zhengxk.2006@163.com)

Running title: Screening and Identification of a *Streptomyces rehmannaiae*

## Supplementary Materials

**Table S1** Fermentation medium used in this study.

| Medium  | Ingredients and content                                                                                                                                                                                                                                   |
|---------|-----------------------------------------------------------------------------------------------------------------------------------------------------------------------------------------------------------------------------------------------------------|
| GYM I   | skim milk powder 0.1%, yellow bean cake flour 2%, sucrose 8%, K <sub>2</sub> HPO <sub>4</sub> ·3H <sub>2</sub> O 0.1%, FeSO <sub>4</sub> ·7H <sub>2</sub> O 0.1%, CaCO <sub>3</sub> 0.3%, pH 7.2-7.4                                                      |
| GYM III | D-glucose 0.4%, yeast extract powder 0.4%, malt extract 1%, CaCO <sub>3</sub> 0.2%, pH 7.2                                                                                                                                                                |
| ISP 2   | yeast extract powder 0.4%, malt extract 1%, D-glucose 0.4%, pH 7.2-7.4                                                                                                                                                                                    |
| HZ-2    | yeast extract powder 0.4%, FeSO <sub>4</sub> ·7H <sub>2</sub> O 0.1%, malt extract 0.2%, D-glucose 1%, soluble starch 4%, CaCO <sub>3</sub> 0.2%, MnCl <sub>2</sub> ·4H <sub>2</sub> O 0.1%, pH 7.2-7.4                                                   |
| GY      | yeast extract powder 1%, D-glucose 1%, K <sub>2</sub> HPO <sub>4</sub> ·3H <sub>2</sub> O 0.05%, MgSO <sub>4</sub> ·7H <sub>2</sub> O 0.05%, pH 7.2-7.4                                                                                                   |
| HZ-1    | yeast extract powder 0.4%, maltodextrin 1%, D-glucose 1%, soluble starch 4%, trace element solution 0.1mL/L (FeSO <sub>4</sub> ·7H <sub>2</sub> O 0.1%, MnCl <sub>2</sub> ·4H <sub>2</sub> O 0.1%, ZnSO <sub>4</sub> ·7H <sub>2</sub> O 0.1%), pH 7.2-7.4 |
| MB      | D-glucose 1%, soluble starch 0.5%, yeast extract powder 0.2%, NaCl 0.4%, peptone 0.2%, K <sub>2</sub> HPO <sub>4</sub> ·3H <sub>2</sub> O 0.05%, MgSO <sub>4</sub> ·7H <sub>2</sub> O 0.05%, CaCO <sub>3</sub> 0.2%, pH 7.2                               |
| H9      | soluble starch 2%, cottonseed meal powder 1%, yeast extract powder 0.5%, maltodextrin 2%, malt extract 0.5%, MgSO <sub>4</sub> ·7H <sub>2</sub> O 0.2%, NaCl 0.2%, CaCO <sub>3</sub> 0.2%, pH 7.0-7.2                                                     |

**Table S2.** Genes and their position and products associated in nigericin biosynthetic gene cluster.

| Identifiers | Position          | Product  |
|-------------|-------------------|----------|
| ABC84455.1  | 420 - 1232 (-)    | NigE     |
| ABC84456.1  | 1475 - 8722 (+)   | NigAI    |
| ABC84457.1  | 8764 - 15465 (+)  | NigAII   |
| ABC84458.1  | 15507 - 27758 (+) | NigAIII  |
| ABC84459.1  | 27775 - 39942 (+) | NigAIV   |
| ABC84460.1  | 39985 - 52122 (+) | NigAV    |
| ABC84461.1  | 52139 - 57244 (+) | NigAVI   |
| ABC84462.1  | 57331 - 58197 (-) | NigCII   |
| ABC84463.1  | 58370 - 59629 (+) | NigD     |
| ABC84464.1  | 59705 - 60043 (-) | NigAXI   |
| ABC84465.1  | 60152 - 64051 (-) | NigAX    |
| ABC84466.1  | 64048 - 65478 (-) | NigCI    |
| ABC84467.1  | 65513 - 65980 (-) | NigBIII  |
| ABC84468.1  | 66016 - 66453 (-) | NigBI    |
| ABC84469.1  | 66450 - 72278 (-) | NigAIX   |
| ABC84470.1  | 72327 - 78947 (-) | NIGAVIII |
| ABC84471.1  | 78995 - 93358 (-) | NigAVII  |
| ABC84472.1  | 93400 - 93948 (-) | unknown  |

## Figure legends

**Figure S1** The deposit certificate of strain Rer75.

**Figure S2** Morphological characteristics of aerial mycelia and spores of strain Rer75 using SEM.

**Figure S3** Cultural characteristics observed on tested media for strain Rer75.

**Figure S4** Phospholipid composition of strain Rer75.

**Figure S5** Subsystem statistics of *Streptomyces* sp. Rer75 genome analyzed by RAST.

**Figure S6** HPLC of compound **1**.

**Figure S7** HRESIMS of compound **1**.

**Figure S8**  $^1\text{H}$  spectrum of compound **1**.

**Figure S9**  $^1\text{H}$  NMR of expanded regions at 2–2.7 ppm.

**Figure S10**  $^1\text{H}$  NMR of expanded regions at 5–7.1 ppm.

**Figure S11**  $^{13}\text{C}$  spectrum of compound **1**.

**Figure S12** Dept 135 spectrum of compound **1**.

**Figure S13** HSQC spectrum of compound **1**.

**Figure S14**  $^1\text{H}$ - $^1\text{H}$  cosy spectrum of compound **1**.

**Figure S15** HMBC spectrum of compound **1**.

# 中国典型培养物保藏中心

用于专利程序的培养物保藏受理通知书 (收据)

地址: 中国, 武汉, 武汉大学 邮编: 430072 电话: (027) 68754052 传真: (027) 68754833 E-mail: cctcc@whu.edu.cn

请求保藏人及其代理人:

请求保藏人: 河南中医药大学 何海荣

专利代理人:

专利申请号:

您(们)提供请求保藏的培养物名称  
及注明的鉴别特征:

本保藏中心保藏编号  
CCTCC NO: M 20231749

*Streptomyces rehmanna* Rer75

上述请求保藏的培养物附有

科学描述

提议的分类命名

注: 在框内打 √ 号表示有, 打×号表示没有。

该培养物已于 2023 年 09 月 20 日由本保藏中心收到, 并登记入册。根据您(们)的请求, 由该日起保存三十年, 在期满前收到提供培养物样品的请求后再延续保存五年。

该培养物的存活性本保藏中心于 2023 年 09 月 27 日检测完毕, 结果为存活。

中国典型培养物保藏中心

负责人(签名)

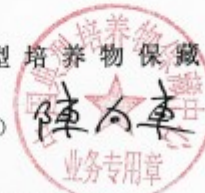

2023 年 09 月 27 日

Figure S1 The deposit certificate of strain Rer75.

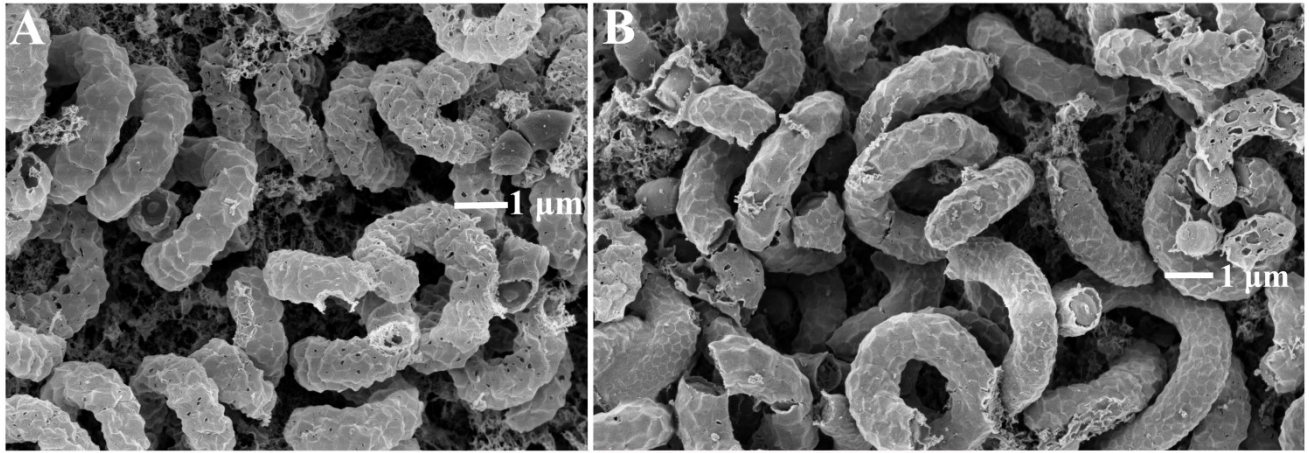

**Figure S2** Morphological characteristics of aerial mycelia and spores of strain Rer75 using SEM.

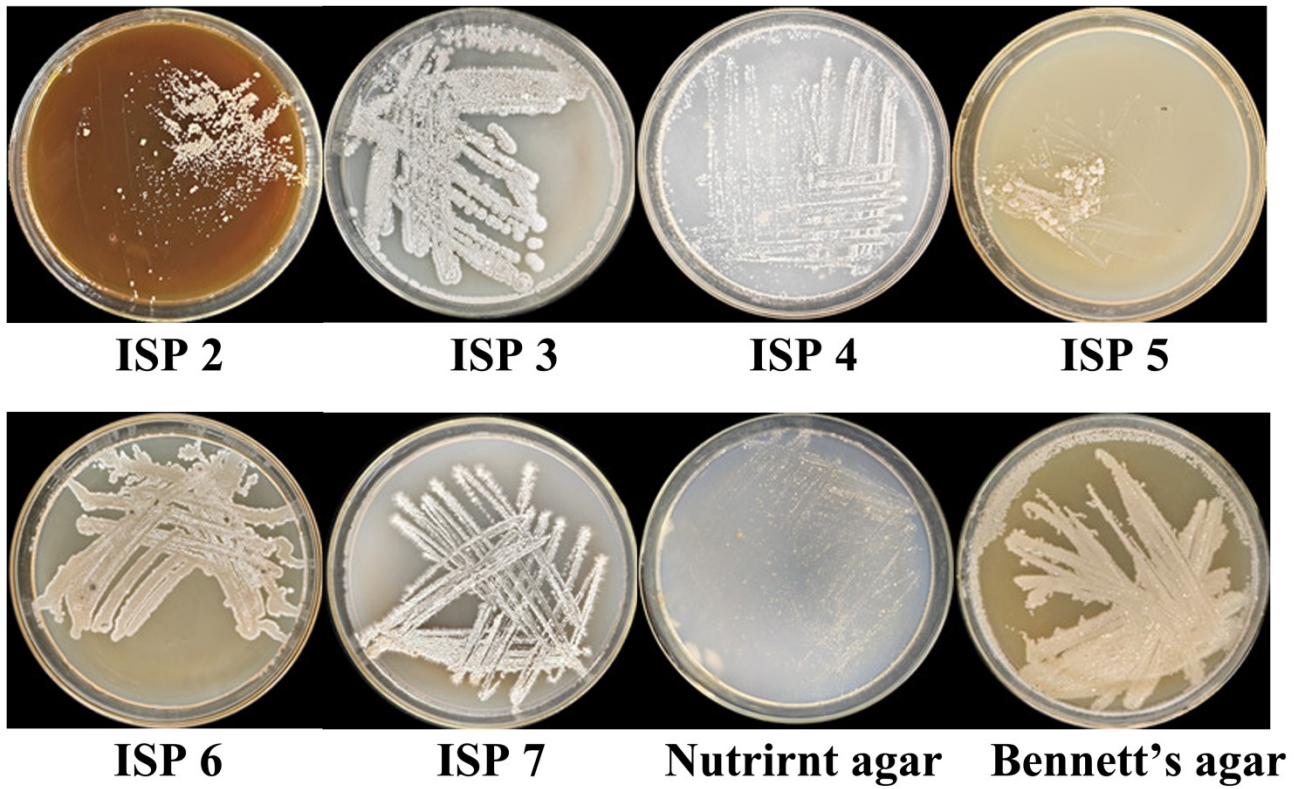

**Figure S3** Cultural characteristics observed on tested media for strain Rer75.

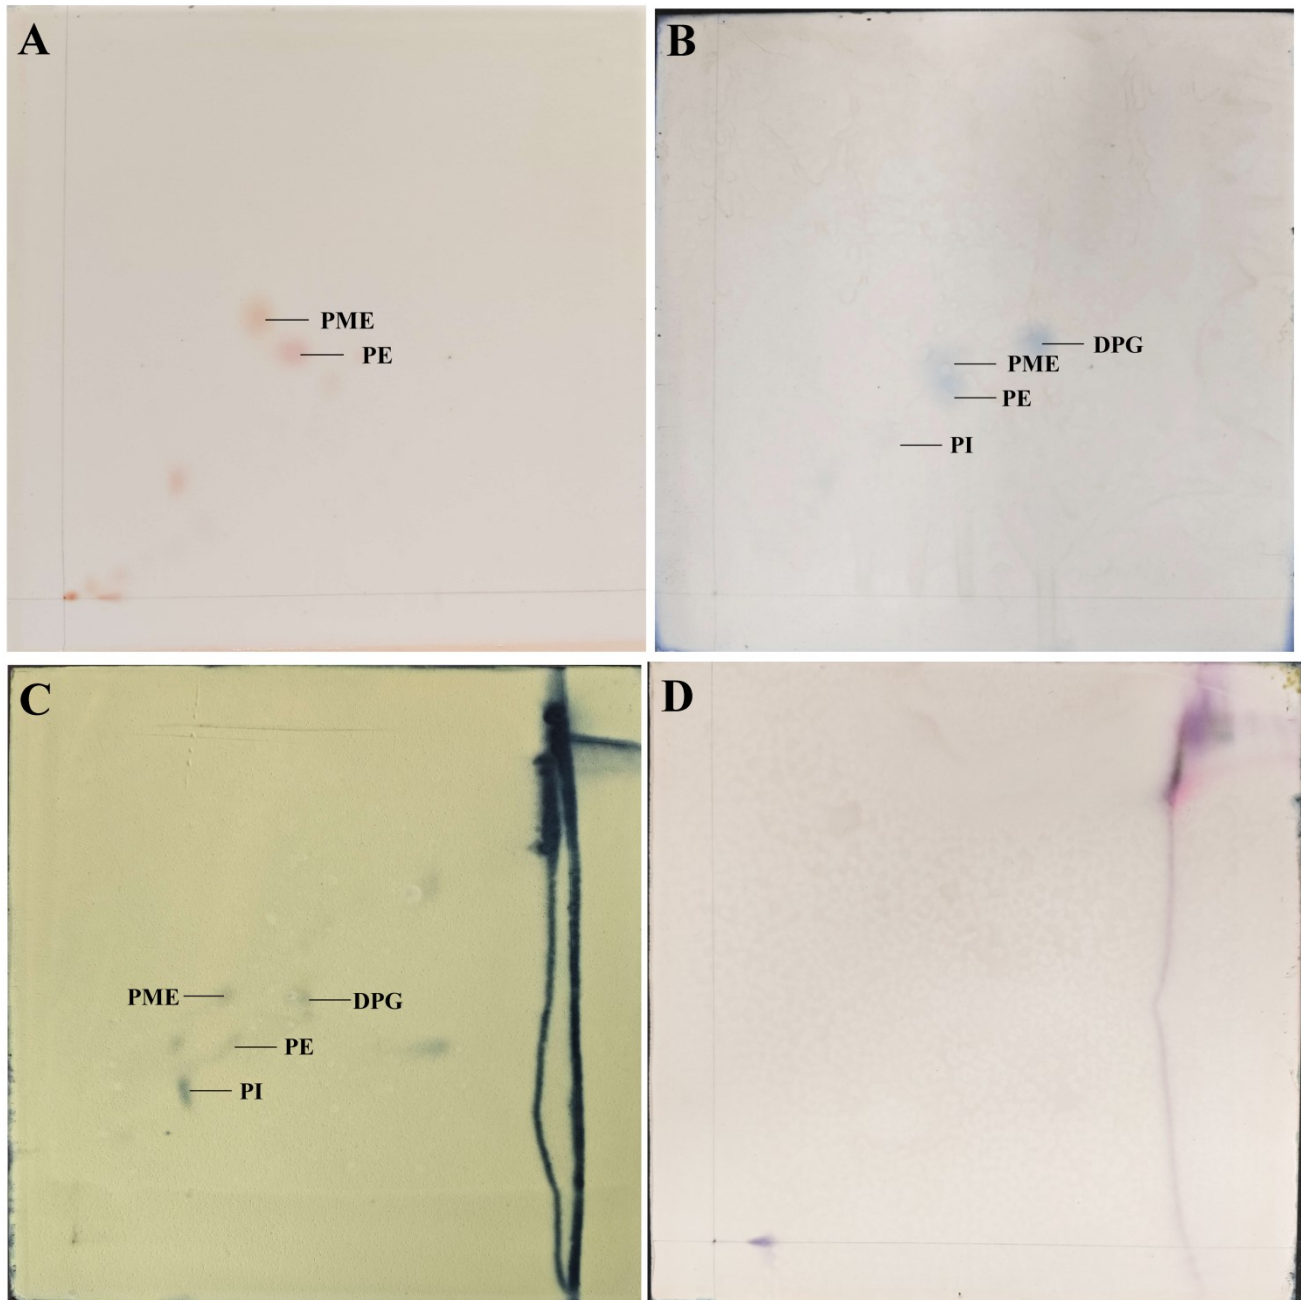

**Figure S4** Phospholipid composition of strain Rer75

Subsystem Coverage

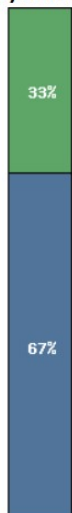

Subsystem Category Distribution

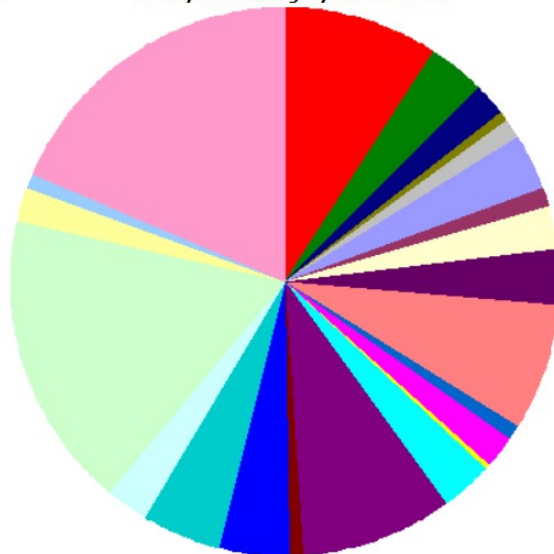

Subsystem Feature Counts

- ☒ Cofactors, Vitamins, Prosthetic Groups, Pigments (428)
- ☒ Cell Wall and Capsule (158)
- ☒ Virulence, Disease and Defense (90)
- ☒ Potassium metabolism (21)
- ☒ Photosynthesis (0)
- ☒ Miscellaneous (56)
- ☒ Phages, Prophages, Transposable elements, Plasmids (4)
- ☒ Membrane Transport (146)
- ☒ Iron acquisition and metabolism (56)
- ☒ RNA Metabolism (117)
- ☒ Nucleosides and Nucleotides (149)
- ☒ Protein Metabolism (345)
- ☒ Cell Division and Cell Cycle (34)
- ☒ Motility and Chemotaxis (12)
- ☒ Regulation and Cell signaling (92)
- ☒ Secondary Metabolism (20)
- ☒ DNA Metabolism (141)
- ☒ Fatty Acids, Lipids, and Isoprenoids (405)
- ☒ Nitrogen Metabolism (38)
- ☒ Dormancy and Sporulation (10)
- ☒ Respiration (194)
- ☒ Stress Response (219)
- ☒ Metabolism of Aromatic Compounds (114)
- ☒ Amino Acids and Derivatives (803)
- ☒ Sulfur Metabolism (87)
- ☒ Phosphorus Metabolism (46)
- ☒ Carbohydrates (822)

Figure S5 Subsystem statistics of *Streptomyces* sp. Rer75 genome analyzed by RAST.

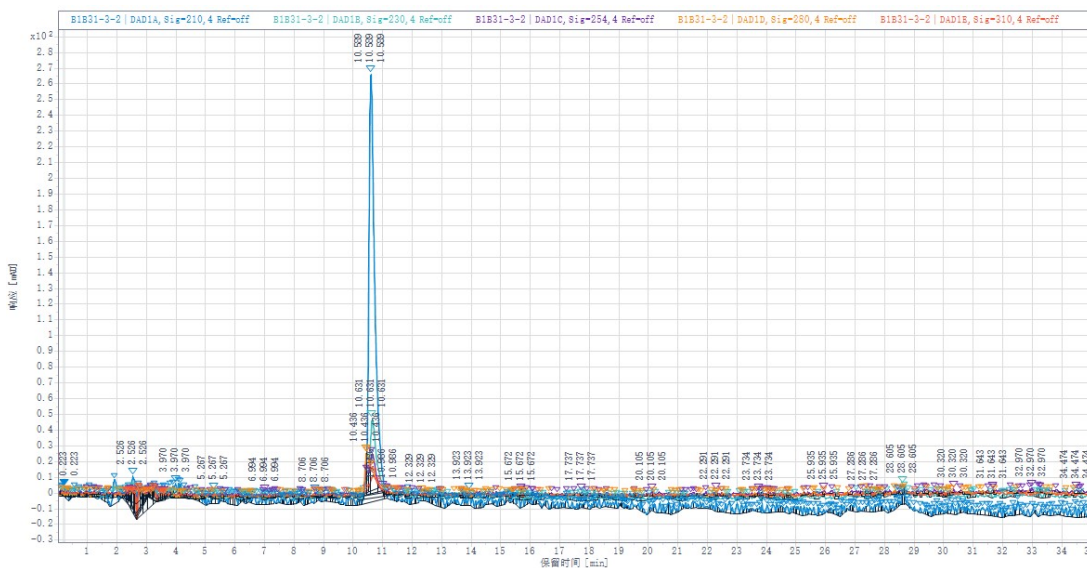

Figure S6 HPLC of Compound 1.

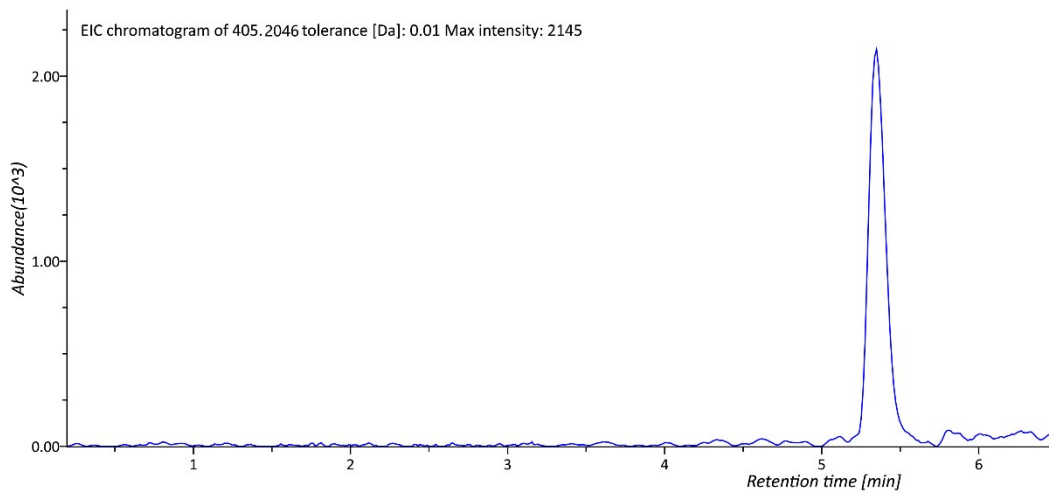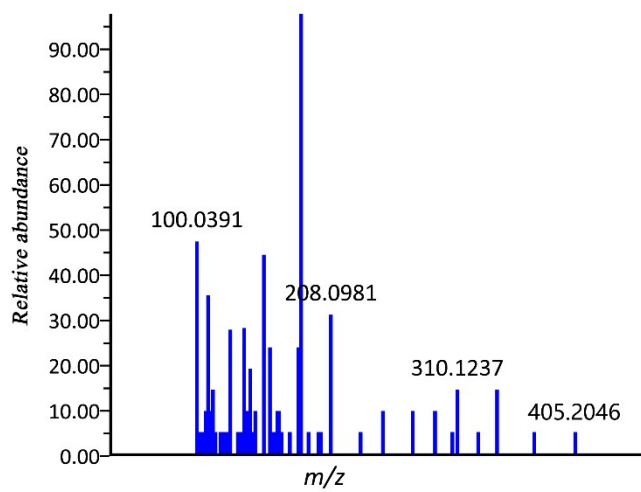

**Figure S7** HRESIMS of compound **1**.



HJR-A1-10.1.fid  
HJR-A1-10  
MEOD

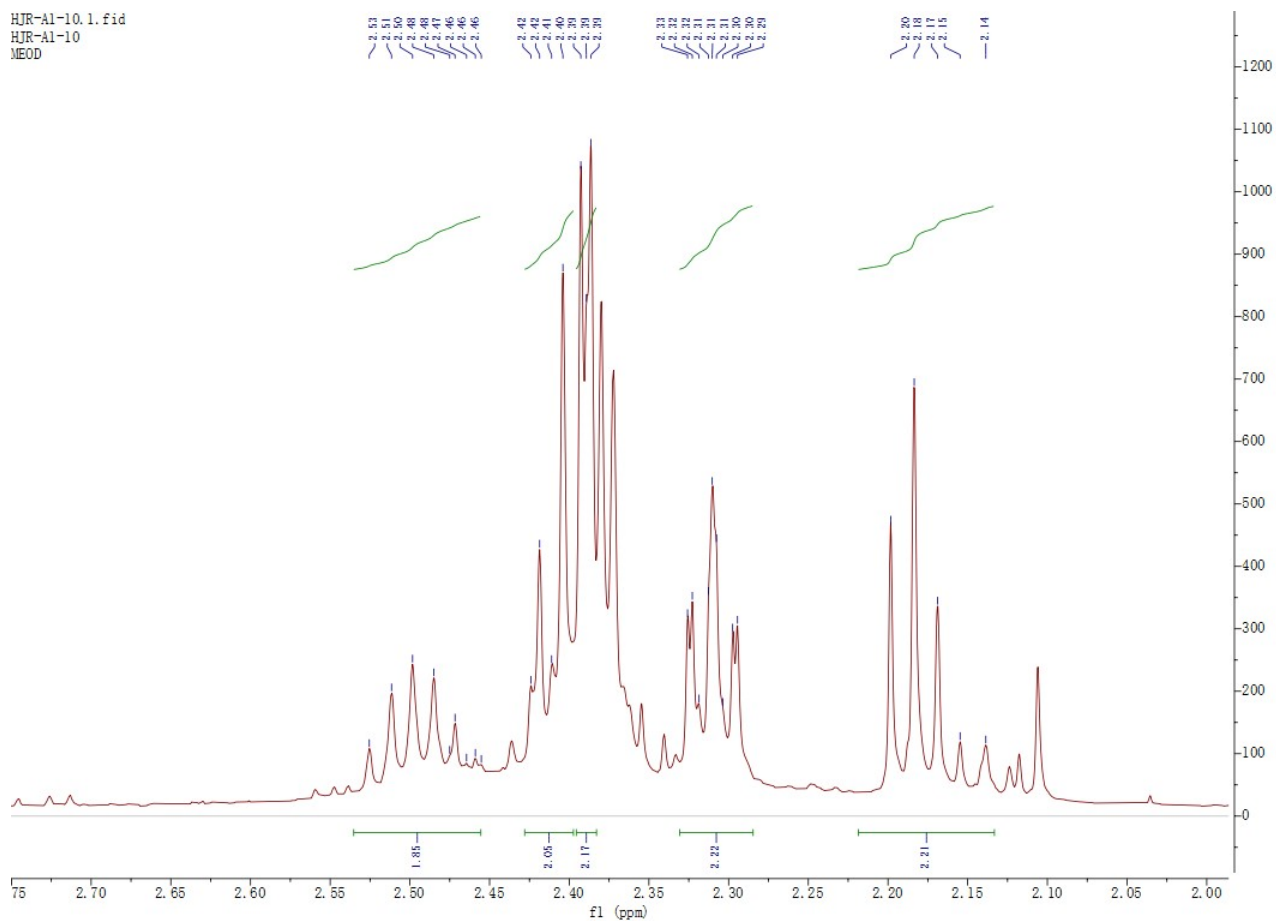

**Figure S9**  $^1\text{H}$  NMR of expanded regions at 2–2.7 ppm.

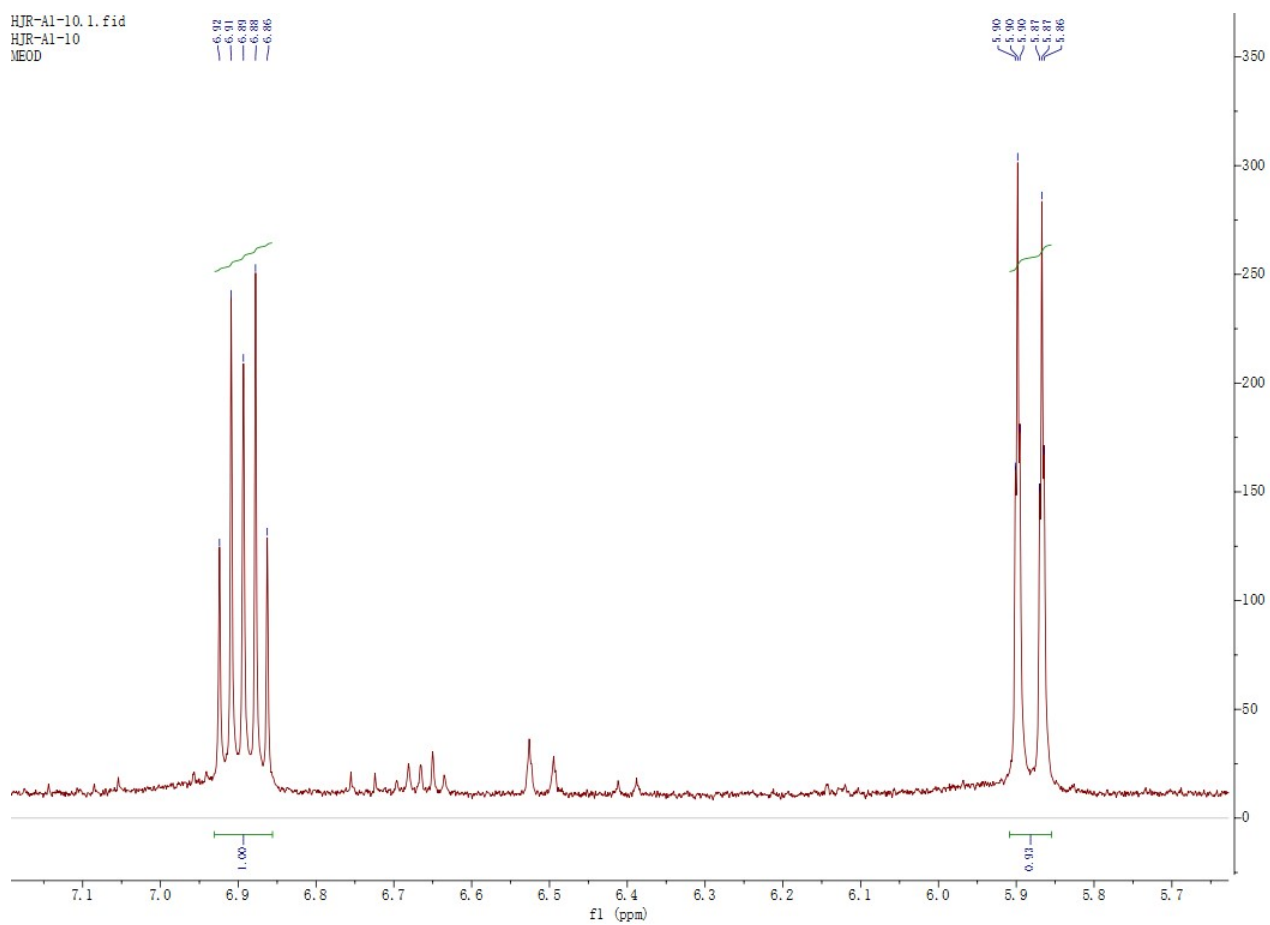

**Figure S10**  $^1\text{H}$  NMR of expanded regions at 5–7.1 ppm.

HJR-A1-10.3.fid  
HJR-A1-10 C  
MEOD

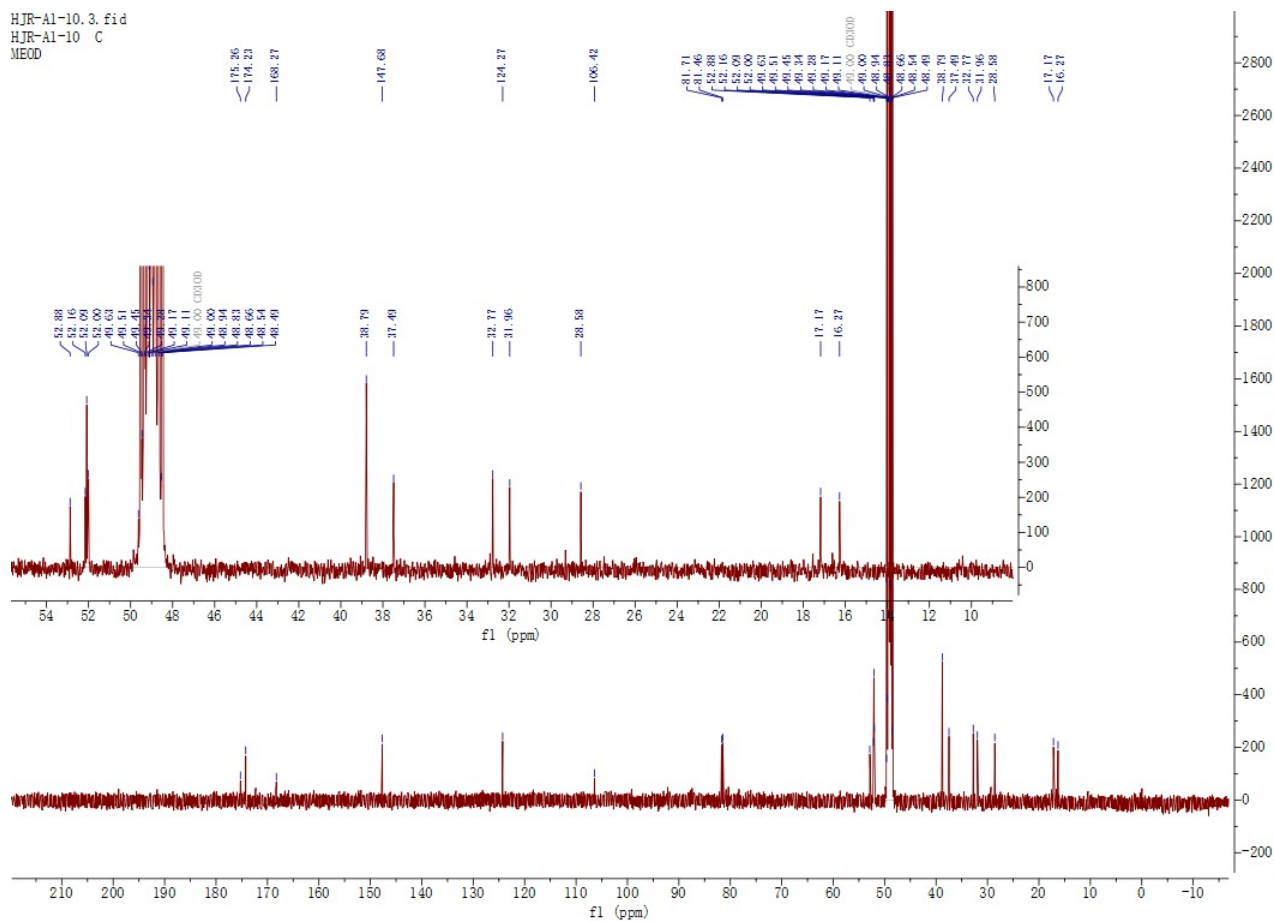

Figure S11 <sup>13</sup>C spectrum of compound 1.

HJR-Al-10.4.fid  
HJR-Al-10 dept135  
meod

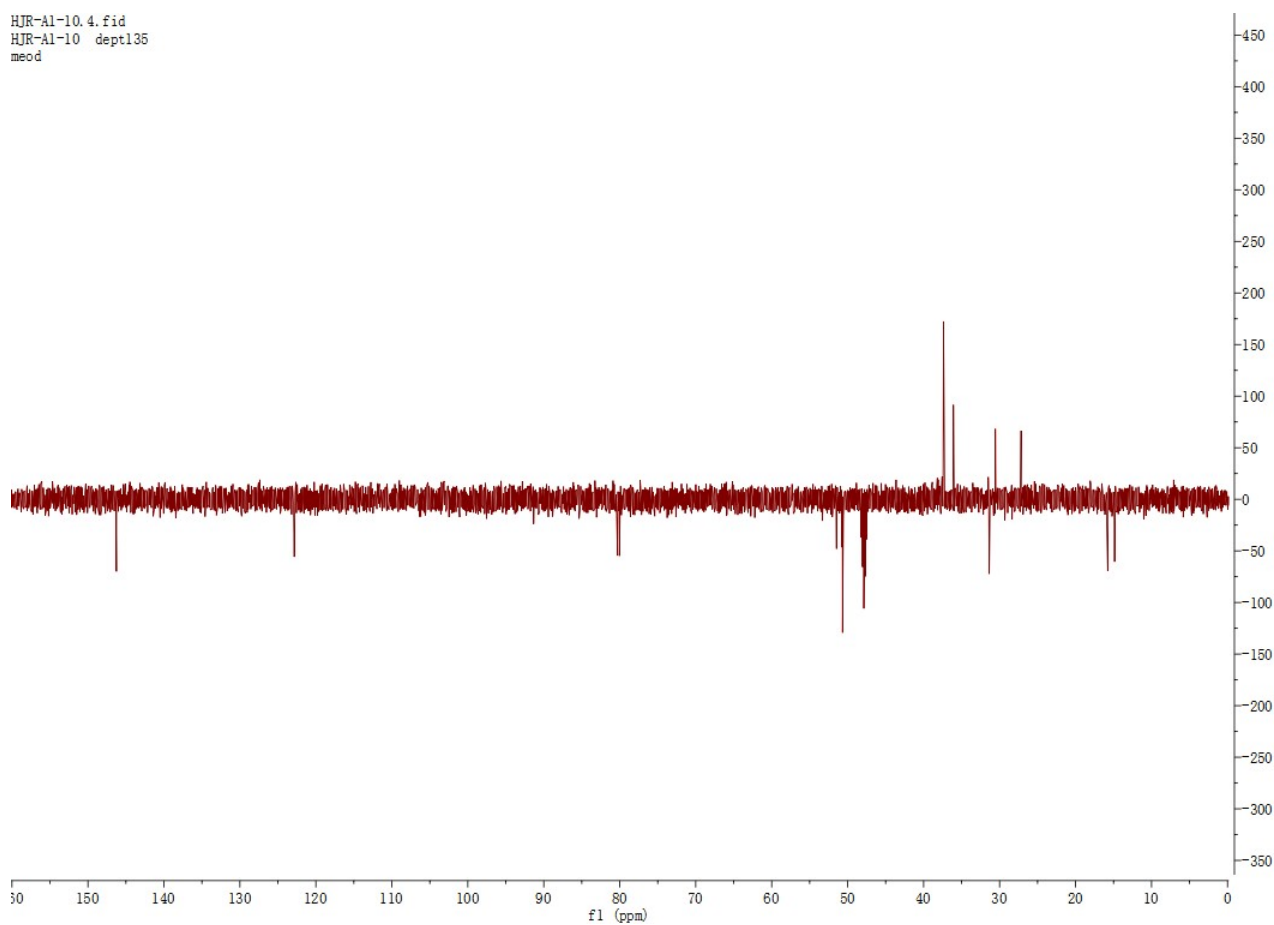

**Figure S12** Dept 135 spectrum of compound **1**.

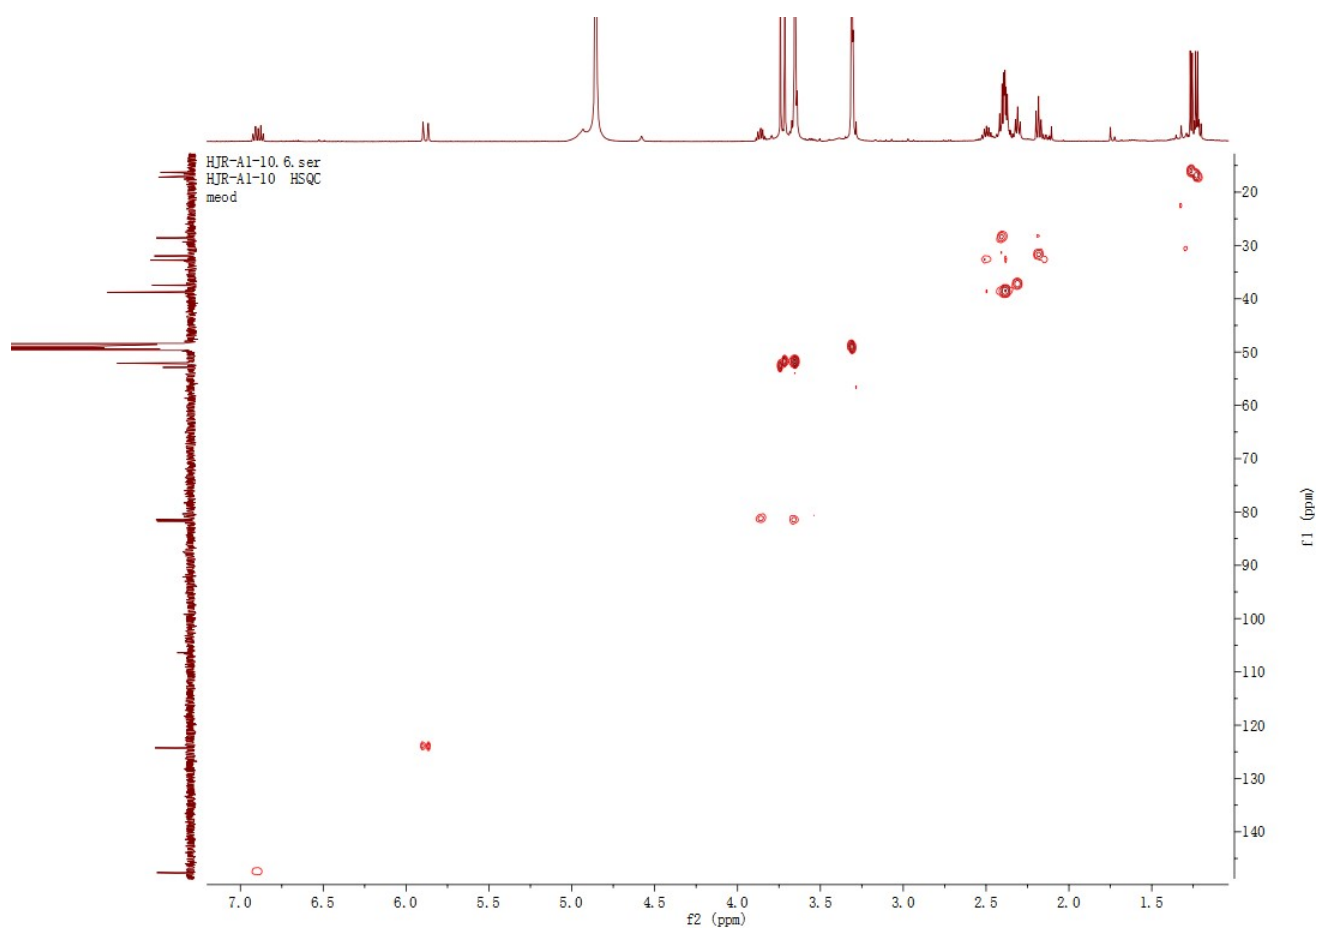

**Figure S13** HSQC spectrum of compound **1**.

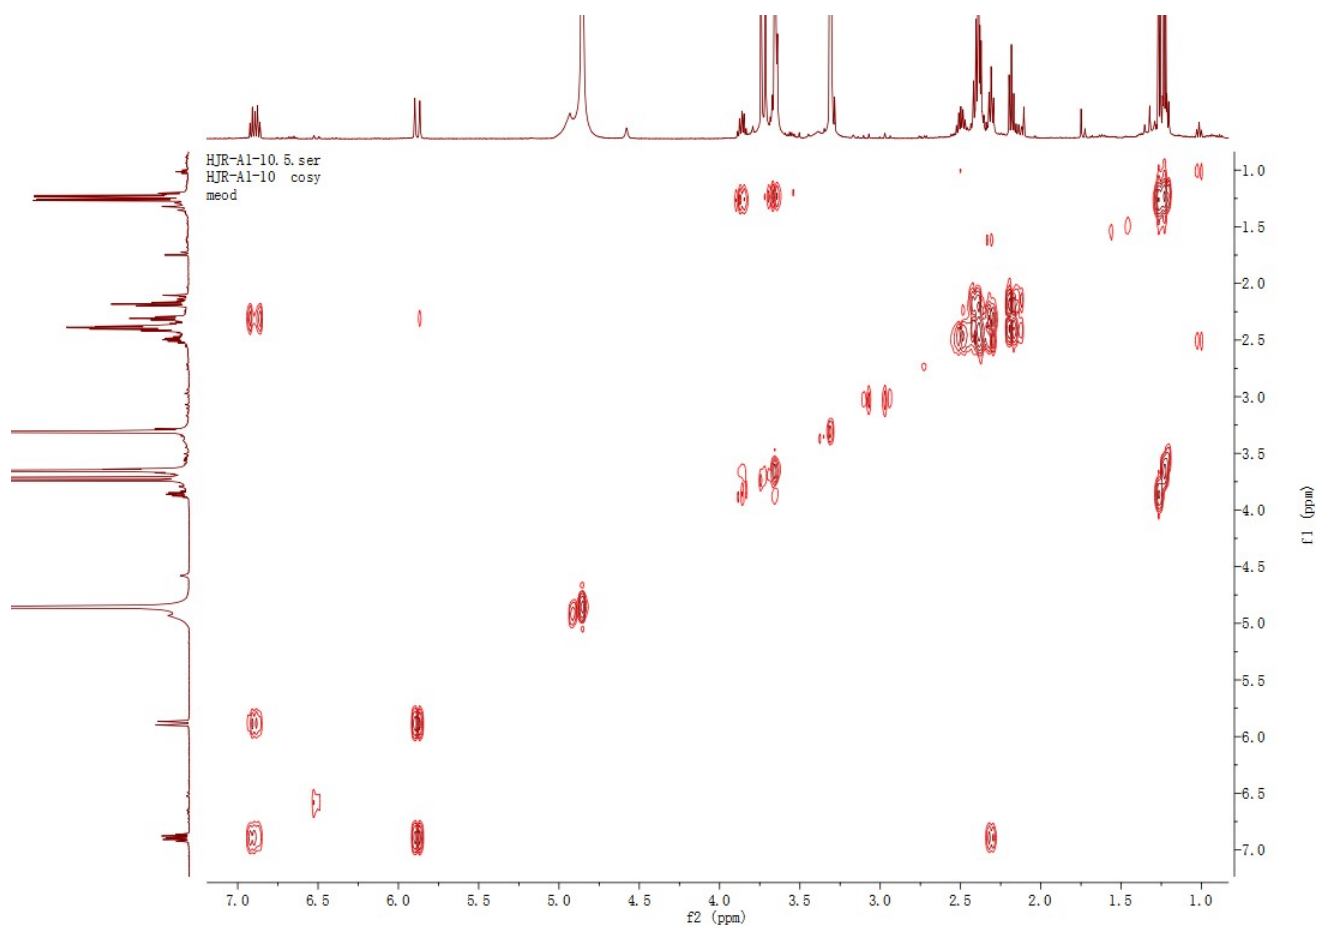

**Figure S14**  $^1\text{H}$ - $^1\text{H}$  cosy spectrum of compound **1**.

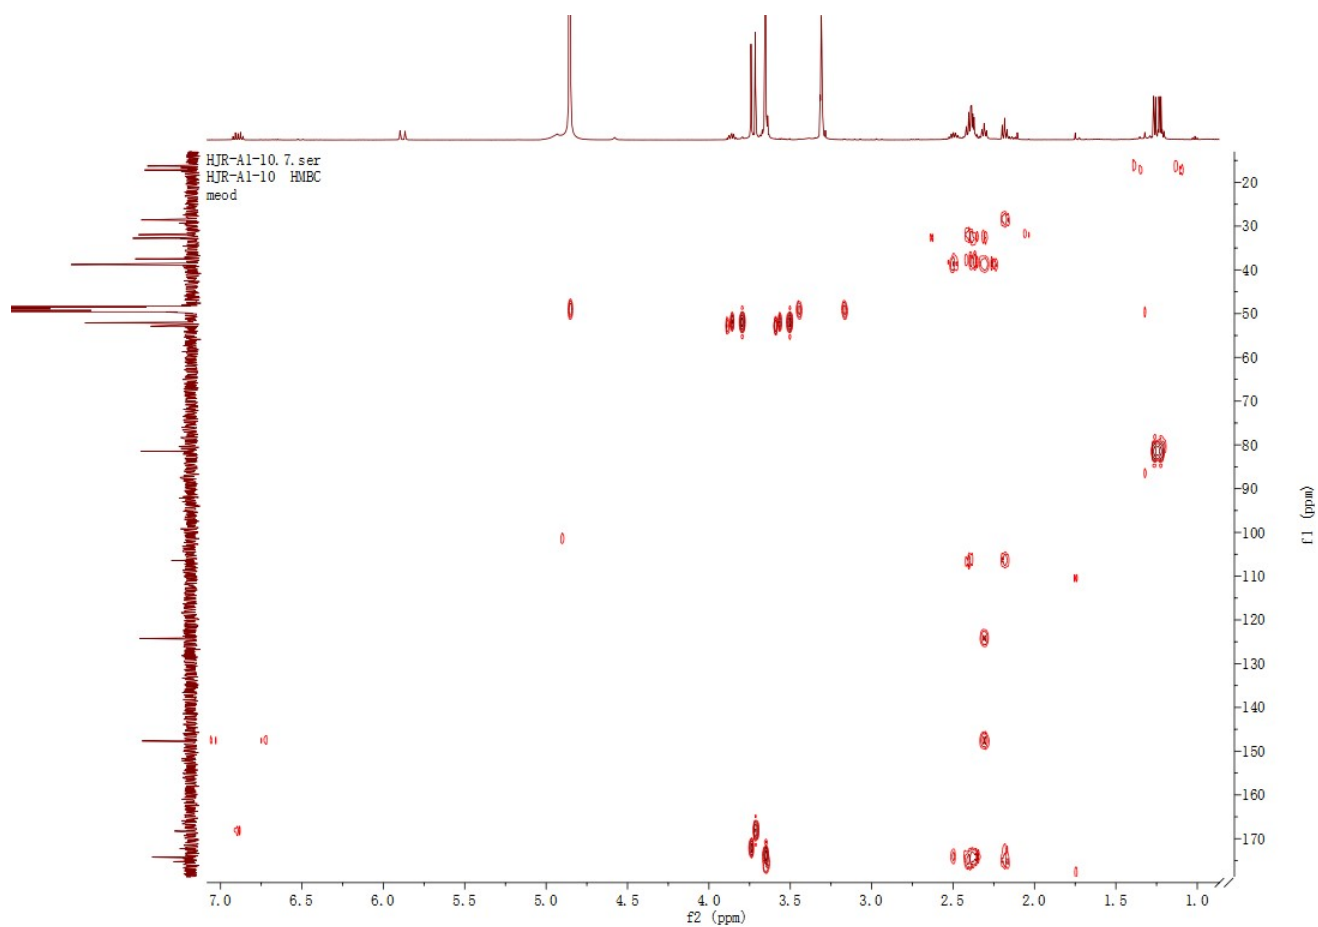

**Figure S15** HMBC spectrum of compound **1**.
